# Supplementary material for: Dual Add-on Therapy in Type 2 Diabetes Poorly Controlled With Metformin Monotherapy: A Randomized Double-Blind Trial of Saxagliptin Plus Dapagliflozin Addition Versus Single Addition of Saxagliptin or Dapagliflozin to Metformin
Source: Oxford University Press journal article supplement (doi:10.2337/dc14-1142), 2014-10-28
Supplement: dc141142supplementarydata.pdf [file dc141142supplementarydata.pdf]

## SUPPLEMENTARY DATA

### Supplementary Text.

#### Principal Investigators

*Canada:* Naresh Aggarwal, Arun Nayar, Brian Carlson, Andre Frechette, James Conway, Vincent Woo. *Mexico:* Jose G Gonzalez Gonzalez, Marisol Herrera Marmolejo, Carlos E Medina Pech, Guadalupe Morales Franco, Enrique C Morales-Villegas, Luis A Nevarez Ruiz, Leobardo Saugue Reyna, Hector ET Perez. *Poland:* Monika Lukaszewicz, Lidia Tokarska, Malgorzata Jozefowska, Marek Konieczny, Jolanta Kitowska-Koterla, Ewa Krzyzagska, Maciej Horodecki, Malgorzata Koziol. *Puerto Rico:* Elizabeth A Barranco Santana, Wanda Ramos-Velez, Amaury A Roman-Miranda, Francisco A Feshold, Miguel Sosa-Padilla. *Republic of Korea:* Yong Wook Cho, Ie Byung Park, Kun-Ho Yoon, Soon Jib Yoo, In Kyu Lee, Bong Soo Cha, Kyoung-Soo Park. *Romania:* Gabriela Serban, Cristina V Mistodie, Mihaela V Vlaiculescu, Catalin Ionescu, Alexandrina Popescu, Gabriela Roman, Liana R Turcu, Camelia Panus, Romulus Z Timar, Fraga S Paveliu. *South Africa:* Deepak Lakha, Naeem Siddique, Kathleen Coetzee, Catharina E Pretorius, Shaunagh Emanuel, Lesley J Burgess, As'Ad Bhorat, Hendrik Nortje, Aysha E Badat, Modise B Maphutha. *United States:* David A Claassen, Ira F Fenton, Kathryn Lucas, Marina Raikhel, Flavia L Thomas, Judith L White, Danilo Lopez, Rick J Whiles, Lucita Cruz, Patricia P Buchanan, Danny Sugimoto, Baxter D Wellman, Christopher M Chappel, David R Allen, Dale C Allison, Val R Hansen, Thomas Mcknight, Kari T Uusinarkaus, Wilfredo E Bravo, Ronald K Garcia, Ben H Lasko, Kwabena Ayesu, Mandeep S Oberoi, Jaime D Sandoval, Robert E Harrell Jr, Mel Lucas, Joseph Lillo, Andres Patron, Alan Kravitz, Leah M Schmidt, Jose M L Elacion, Tami R Bruce, Kathryn R Rigonan, Paramjit S Parmar, William J Randall, Jennifer S Kay, William P Fitzgibbons, Teresa Sligh, Paul H Wakefield, Julio Rosenstock, Michael Zimmerer, Rebecca S Jordan, Barry K Mclean, Mehrdad K Ariani, Kim M Barbel-Johnson, Donn Keels, Gilbert R Weiner, Gilbert Ledesma, Jonathan P Wilson, Robert D Madder, Aron Schlau, Sam S Miller, Derek Muse, Karlton S Pettis, Louis M Stephens Jr, Joel M Neutel, Lisa B Connery, Baudilio Cusco-Prieto, Vernon J Hersberger, Elizabeth Burkett, David S Ramstad, Gholamreza Bonabi, Curtis W Taylor, Brian D Snyder, Michael S Vaughn, David M Gorson, Richard L Montgomery, Anthony F Harris, Gordon Sack, James Thrasher, John D Gabriel, Andrew J Lewin, Conigliaro Jones, Marietta F Abalos-Galito.

# SUPPLEMENTARY DATA

## Supplementary Figure 1. Patient disposition

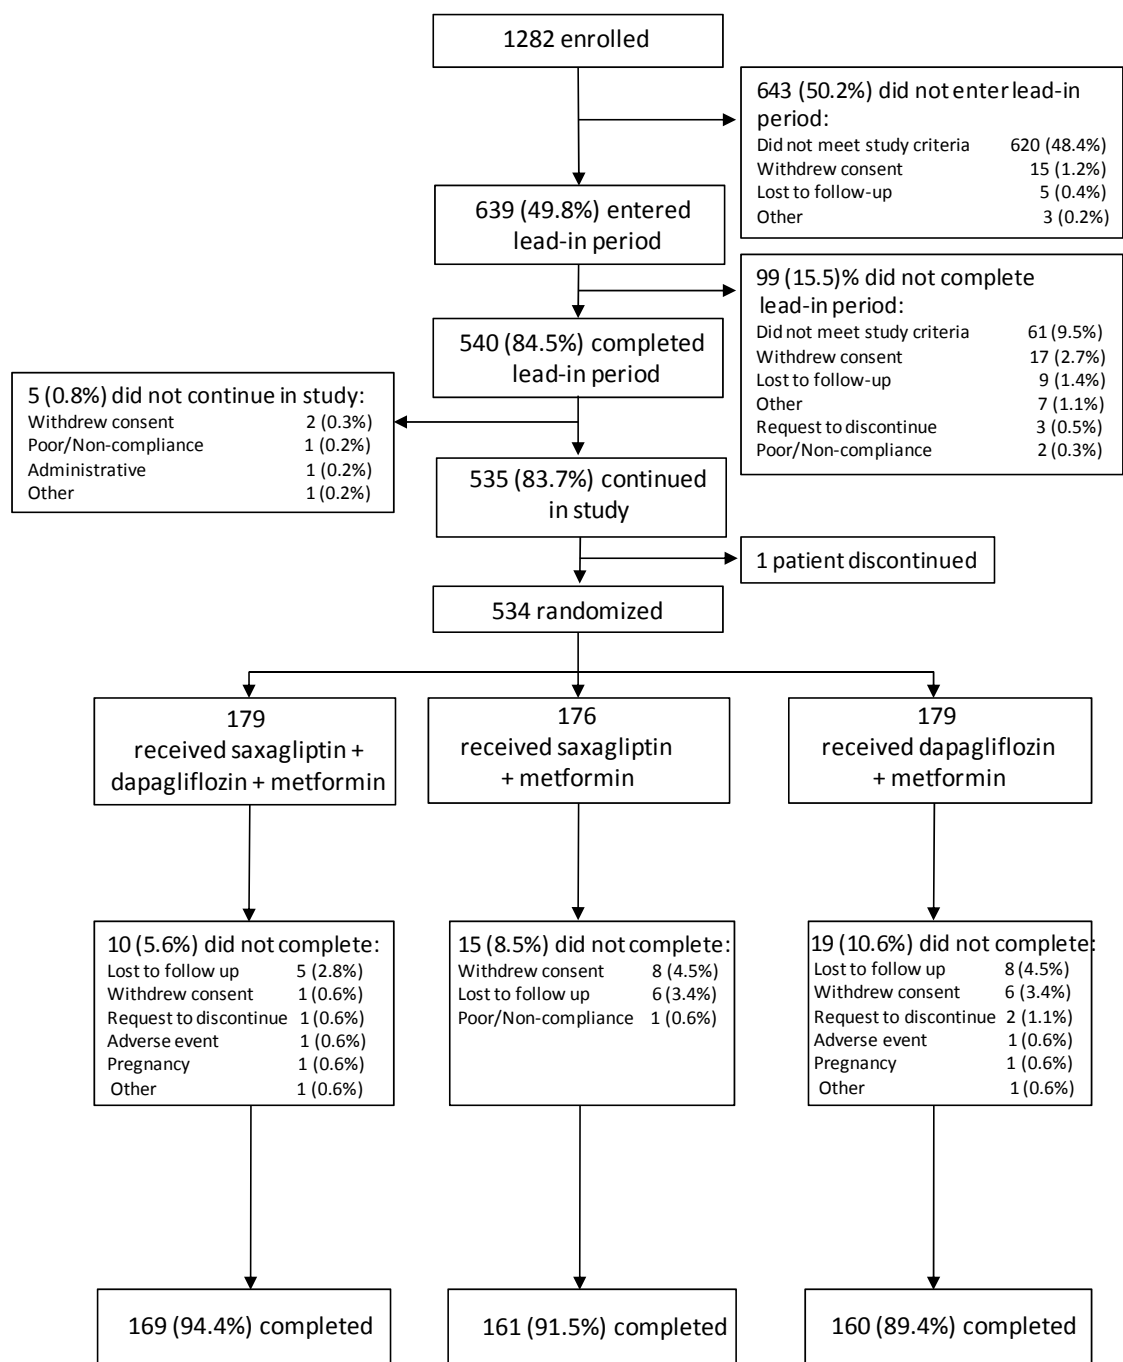

SUPPLEMENTARY DATA

**Supplementary Table 1.** Adjusted Mean Change From Baseline at 24 Weeks in HbA1c Stratified by Baseline HbA1c Subgroup

| <b>Baseline HbA1c subgroup</b>                                  | <b>SAXA+DAPA+MET<br/>n=179</b>               | <b>SAXA+MET<br/>n=176</b>                    | <b>DAPA+MET<br/>n=179</b>                    |
|-----------------------------------------------------------------|----------------------------------------------|----------------------------------------------|----------------------------------------------|
| <8% (<64 mmol/mol)                                              |                                              |                                              |                                              |
| Baseline mean (SD), %<br>[mmol/mol]                             | 7.50 (0.40)<br>[58 (4.4)]                    | 7.61 (0.31)<br>[60 (3.4)]                    | 7.41 (0.44)<br>[57 (4.8)]                    |
| n*                                                              | 37                                           | 29                                           | 37                                           |
| Adjusted mean change<br>from baseline (95% CI), %<br>[mmol/mol] | −0.80 (−1.12, −0.47)<br>[−9 (−12.2, −5.1)]   | −0.69 (−1.06, −0.33)<br>[−8 (−11.6, −3.6)]   | −0.45 (−0.77, −0.13)<br>[−5 (−8.4, −1.4)]    |
| Mean (95% CI) difference<br>vs SAXA+DAPA+MET                    |                                              | −0.10 (−0.60, 0.39)<br>[−1 (−6.6, 4.3)]      | −0.35 (−0.81, 0.11)<br>[−4 (−8.9, 1.2)]      |
| ≥8% to <9% (≥64 to <75<br>mmol/mol)                             |                                              |                                              |                                              |
| Baseline mean (SD), %<br>[mmol/mol]                             | 8.44 (0.26)<br>[69 (2.8)]                    | 8.54 (0.29)<br>[70 (3.2)]                    | 8.49 (0.28)<br>[69 (3.1)]                    |
| n*                                                              | 56                                           | 51                                           | 52                                           |
| Adjusted mean change<br>from baseline (95% CI), %<br>[mmol/mol] | −1.17 (−1.44, −0.90)<br>[−13 (−15.7, −9.8)]  | −0.51 (−0.78, −0.25)<br>[−6 (−8.5, −2.7)]    | −0.84 (−1.11, −0.57)<br>[−9 (−12.1, −6.2)]   |
| Mean (95% CI) difference<br>vs SAXA+DAPA+MET                    |                                              | −0.66 (−1.03, −0.28)<br>[−7 (−11.3, −3.1)]   | −0.33 (−0.71, 0.05)<br>[−4 (−7.8, 0.5)]      |
| ≥9% (≥75 mmol/mol)                                              |                                              |                                              |                                              |
| Baseline mean (SD), %<br>[mmol/mol]                             | 10.02 (0.78)<br>[86 (8.5)]                   | 9.90 (0.75)<br>[85 (8.2)]                    | 9.95 (0.78)<br>[85 (8.5)]                    |
| n*                                                              | 65                                           | 63                                           | 62                                           |
| Adjusted mean change<br>from baseline (95% CI), %<br>[mmol/mol] | −2.03 (−2.27, −1.80)<br>[−22 (−24.8, −19.7)] | −1.32 (−1.56, −1.09)<br>[−14 (−17.1, −11.9)] | −1.87 (−2.11, −1.63)<br>[−20 (−23.1, −17.8)] |
| Mean (95% CI) difference<br>vs SAXA+DAPA+MET                    |                                              | −0.71 (−1.04, −0.38)<br>[−8 (−11.4, −4.2)]   | −0.16 (−0.50, 0.17)<br>[−2 (−5.5, 1.9)]      |

\*Number of randomized patients with non-missing baseline values and week 24 value.

SUPPLEMENTARY DATA

**Supplementary Table 2.** Adjusted Mean Change From Baseline at 24 Weeks in HbA1c Stratified by Age

| Age subgroup, y                                                 | SAXA+DAPA+MET<br>n=179                       | SAXA+MET<br>n=176                           | DAPA+MET<br>n=179                            |
|-----------------------------------------------------------------|----------------------------------------------|---------------------------------------------|----------------------------------------------|
| <65                                                             |                                              |                                             |                                              |
| Baseline mean (SD),<br>% [mmol/mol]                             | 8.98 (1.21)<br>[75 (13.2)]                   | 9.04 (1.10)<br>[75 (12.0)]                  | 8.90 (1.18)<br>[74 (12.9)]                   |
| n*                                                              | 140                                          | 118                                         | 133                                          |
| Adjusted mean change<br>from baseline (95%<br>CI), % [mmol/mol] | −1.47 (−1.64, −1.31)<br>[−16 (−17.9, −14.3)] | −0.85 (−1.02, −0.67)<br>[−9 (−11.1, −7.3)]  | −1.22 (−1.38, −1.05)<br>[−13 (−15.1, −11.5)] |
| Mean (95% CI)<br>difference vs<br>SAXA+DAPA+MET                 |                                              | −0.63 (−0.86, −0.39)<br>[−7 (−9.4, −4.3)]   | −0.26 (−0.49, −0.02)<br>[−3 (−5.4, −0.2)]    |
| ≥65                                                             |                                              |                                             |                                              |
| Baseline mean (SD),<br>% [mmol/mol]                             | 8.50 (0.88)<br>[69 (9.6)]                    | 8.99 (0.79)<br>[75 (8.6)]                   | 8.64 (1.09)<br>[71 (11.9)]                   |
| n*                                                              | 18                                           | 25                                          | 18                                           |
| Adjusted mean change<br>from baseline (95%<br>CI), % [mmol/mol] | −1.40 (−1.87, −0.94)<br>[−15 (−20.4, −10.3)] | −1.04 (−1.42, −0.66)<br>[−11 (−15.5, −7.2)] | −1.05 (−1.51, −0.60)<br>[−12 (−16.5, −6.6)]  |
| Mean (95% CI)<br>difference vs<br>SAXA+DAPA+MET                 |                                              | −0.37 (−0.97, 0.24)<br>[−4 (−10.6, 2.6)]    | −0.35 (−1.00, 0.30)<br>[−4 (−10.9, 3.3)]     |

\*Number of randomized patients with non-missing baseline values and week 24 value.

SUPPLEMENTARY DATA

**Supplementary Table 3.** Proportion of Patients Achieving HbA1c <7% at Week 24 by Baseline HbA1c Subgroup

| <b>Baseline HbA1c subgroup</b>                           | <b>SAXA+DAPA+MET<br/>n=179</b> | <b>SAXA+MET<br/>n=176</b> | <b>DAPA+MET<br/>n=179</b> |
|----------------------------------------------------------|--------------------------------|---------------------------|---------------------------|
| <8% (64 mmol/mol)                                        |                                |                           |                           |
| Baseline mean (SD),<br>% [mmol/mol]                      | 7.50 (0.40)<br>[58 (4.4)]      | 7.61 (0.31)<br>[60 (3.4)] | 7.41 (0.44)<br>[57 (4.8)] |
| X/n*                                                     | 26/40                          | 16/30                     | 18/40                     |
| Proportion (95% CI)<br>adjusted for baseline<br>HbA1c, % | 65 (50.6, 79.7)                | 58 (40.4, 75.5)           | 42 (27.1, 57.0)           |
| Mean (95% CI)<br>difference vs<br>SAXA+DAPA+MET          |                                | 7 (−15.3, 29.4)           | 23 (2.4, 43.7)            |
| ≥8% to <9% (≥64 to 5<br>mmol/mol)                        |                                |                           |                           |
| Baseline mean (SD),<br>% [mmol/mol]                      | 8.44 (0.26)<br>[69 (2.8)]      | 8.54 (0.29)<br>[70 (3.2)] | 8.49 (0.28)<br>[69 (3.1)] |
| X/n*                                                     | 30/58                          | 6/61                      | 11/58                     |
| Proportion (95% CI)<br>adjusted for baseline<br>HbA1c, % | 50 (37.0, 62.4)                | 11 (3.0, 17.9)            | 19 (8.9, 29.1)            |
| Mean (95% CI)<br>difference vs<br>SAXA+DAPA+MET          |                                | 39 (24.5, 53.9)           | 31 (14.5, 46.9)           |
| ≥9% (≥75 mmol/mol)                                       |                                |                           |                           |
| Baseline mean (SD),<br>% [mmol/mol]                      | 10.02 (0.78)<br>[86 (8.5)]     | 9.90 (0.75)<br>[85 (8.2)] | 9.95 (0.78)<br>[85 (8.5)] |
| X/n*                                                     | 18/79                          | 7/84                      | 11/75                     |
| Proportion (95% CI)<br>adjusted for baseline<br>HbA1c, % | 24 (14.3, 32.6)                | 9 (2.6, 14.4)             | 15 (6.6, 22.6)            |
| Mean (95% CI)<br>difference vs<br>SAXA+DAPA+MET          |                                | 15 (4.1, 25.8)            | 9 (−3.2, 21.0)            |

\*X=number of responders, n= number of randomized patients with non-missing baseline and week 24 last observation carried forward values.

SUPPLEMENTARY DATA

**Supplementary Table 4.** Change from baseline at 24 weeks for seated blood pressure and serum fasting lipids.

|                                                           | <b>SAXA+DAPA+MET<br/>n=179</b> | <b>SAXA+MET<br/>n=176</b> | <b>DAPA+MET<br/>n=179</b> |
|-----------------------------------------------------------|--------------------------------|---------------------------|---------------------------|
| Systolic blood pressure, mm Hg<br>n <sup>a</sup>          | 179                            | 176                       | 179                       |
| Baseline mean±SD                                          | 129±12.2                       | 128±12.5                  | 130±14.1                  |
| n <sup>b</sup>                                            | 167                            | 160                       | 157                       |
| Change from baseline mean±SD                              | −1.9±12.0                      | 0.3±10.2                  | −3.5±12.9                 |
| Diastolic blood pressure, mm Hg<br>n <sup>a</sup>         | 179                            | 176                       | 179                       |
| Baseline mean±SD                                          | 78±8.5                         | 78±7.8                    | 79±8.1                    |
| n <sup>b</sup>                                            | 167                            | 160                       | 157                       |
| Change from baseline mean±SD                              | −1.0±8.0                       | −0.4±7.0                  | −1.4±8.4                  |
| Total cholesterol, mg/dL<br>n <sup>b</sup>                | 164                            | 159                       | 155                       |
| Baseline mean±SD                                          | 188±41                         | 193±47                    | 182±36                    |
| Adjusted mean percent change from<br>baseline (95% CI), % | 0.4 (−1.8, 2.7)                | −1.9 (−4.2, 0.3)          | 3.8 (1.5, 6.3)            |
| Difference (95% CI) vs saxagliptin +<br>metformin,%       | 2.4 (−0.8, 5.7)<br>P=0.15      |                           |                           |
| Difference (95% CI) vs dapagliflozin +<br>metformin,%     | −3.3 (−6.4, −0.2)<br>P=0.04    |                           |                           |
| LDL cholesterol, mg/dL<br>n <sup>b</sup>                  | 161                            | 158                       | 153                       |
| Baseline mean±SD                                          | 102±36                         | 103±35                    | 98±30                     |
| Adjusted mean percent change from<br>baseline (95% CI),%  | 3.7 (−0.9, 8.6)                | −0.6 (−5.1, 4.1)          | 1.5 (−3.1, 6.4)           |
| Difference (95% CI) vs saxagliptin +<br>metformin,%       | 4.3 (−2.2, 11.4)<br>P=0.20     |                           |                           |
| Difference (95% CI) vs dapagliflozin +<br>metformin,%     | 2.2 (−4.3, 9.1)<br>P=0.52      |                           |                           |
| HDL cholesterol, mg/dL<br>n <sup>b</sup>                  | 164                            | 159                       | 155                       |
| Baseline mean±SD                                          | 45±11                          | 45±11                     | 43±10                     |

# SUPPLEMENTARY DATA

|                                                                                                                     |                                       |                                    |                                    |
|---------------------------------------------------------------------------------------------------------------------|---------------------------------------|------------------------------------|------------------------------------|
| Adjusted mean percent change from baseline (95% CI) ,%                                                              | 5.4 (3.0, 7.8)                        | 0.9 (−1.4, 3.3)                    | 7.7 (5.2, 10.2)                    |
| Difference (95% CI) vs saxagliptin + metformin,%                                                                    | 4.4 (1.1, 7.8)<br><i>P</i> =0.009     |                                    |                                    |
| Difference (95% CI) vs dapagliflozin + metformin,%                                                                  | −2.1 (−5.3, 1.1)<br><i>P</i> =0.19    |                                    |                                    |
| Triglycerides, mg/dL<br>n <sup>b</sup><br>Baseline mean±SD<br>Adjusted mean percent change from baseline (95% CI),% | 163<br>221±194<br>−10.8 (−16.0, −5.4) | 159<br>248±302<br>−3.7 (−9.4, 2.2) | 155<br>216±166<br>−2.5 (−8.3, 3.6) |
| Difference (95% CI) vs saxagliptin + metformin,%                                                                    | −7.4 (−14.9, 0.8)<br><i>P</i> =0.08   |                                    |                                    |
| Difference (95% CI) vs dapagliflozin + metformin,%                                                                  | −8.5 (−15.9, −0.4)<br><i>P</i> =0.04  |                                    |                                    |

<sup>a</sup>Number of randomized patients with non-missing baseline values and at least one post-baseline value.

<sup>b</sup>Number of randomized patients with non-missing baseline values and week 24 values.

DAPA=dapagliflozin; HDL=high density lipoprotein; LDL=low density lipoprotein. MET=metformin; SAXA=saxagliptin.
